# Supplementary material
Source: Springer Nature journal article supplement (https://www.springermedizin.de/resource/supplementary/12969_2012_955_MOESM2_ESM.pdf/9588832)

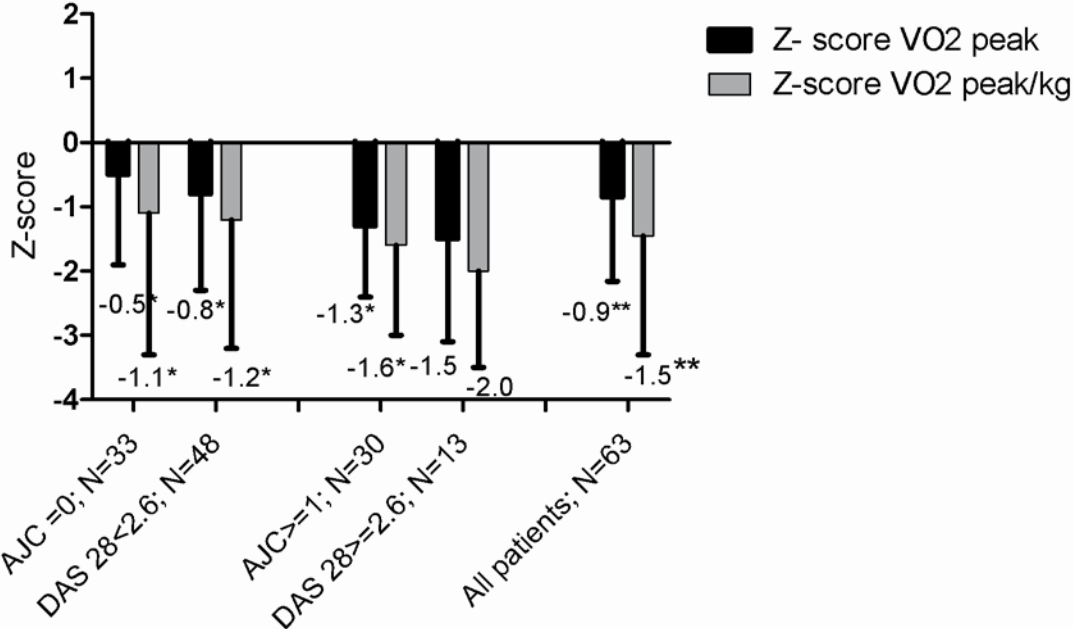

Disease activity by Active Joint Count and DAS 28

Supplement: MOESM2 [file 9588832]
